# Supplementary material for: Activation of Innate and Adaptive Immunity by a Recombinant Human Cytomegalovirus Strain Expressing an NKG2D Ligand
Source: PubMed Central journal article supplement (PMC5131914; doi:10.1371/journal.ppat.1006015), 2016-12-01
Supplement: ppat.1006015.s004.pdf [file ppat.1006015.s004.pdf]

ULBP2-TB40

TB40

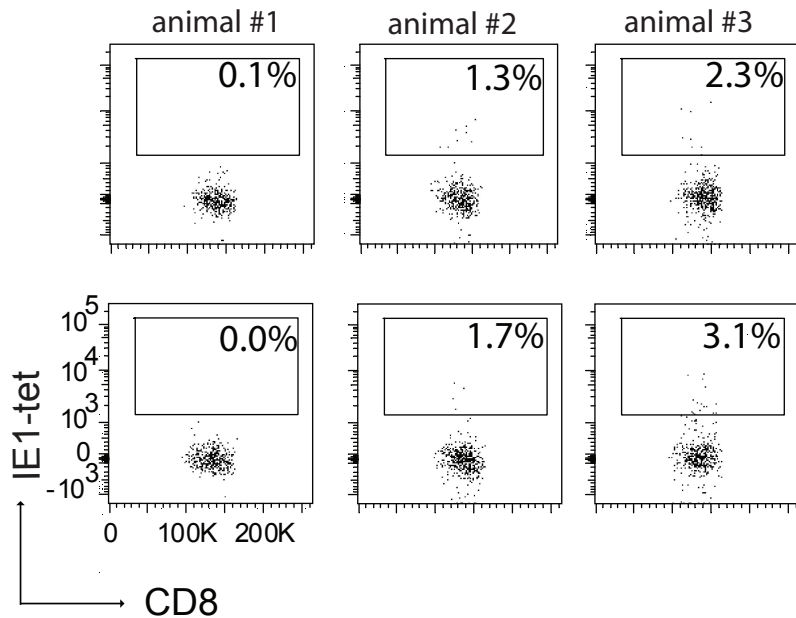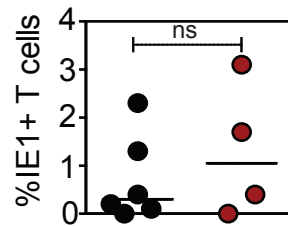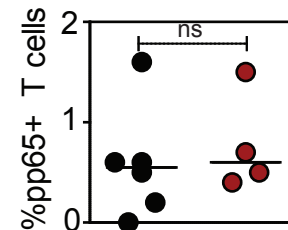

● TB40  
● ULBP2-TB40
