# Supplementary material for: Activation of Innate and Adaptive Immunity by a Recombinant Human Cytomegalovirus Strain Expressing an NKG2D Ligand
Source: PubMed Central journal article supplement (PMC5131914; doi:10.1371/journal.ppat.1006015), 2016-12-01

**A**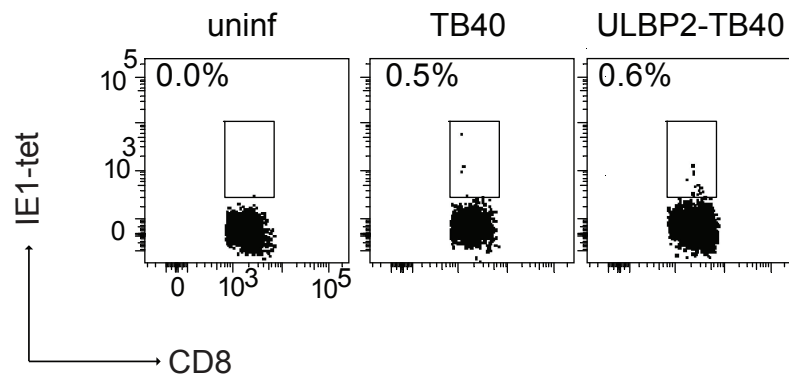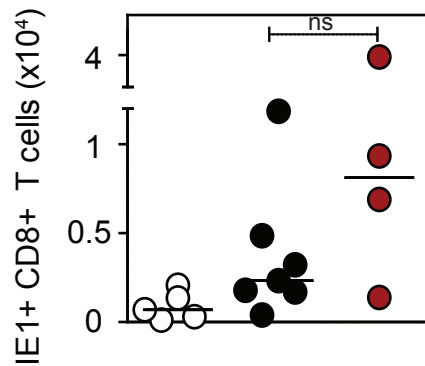**B**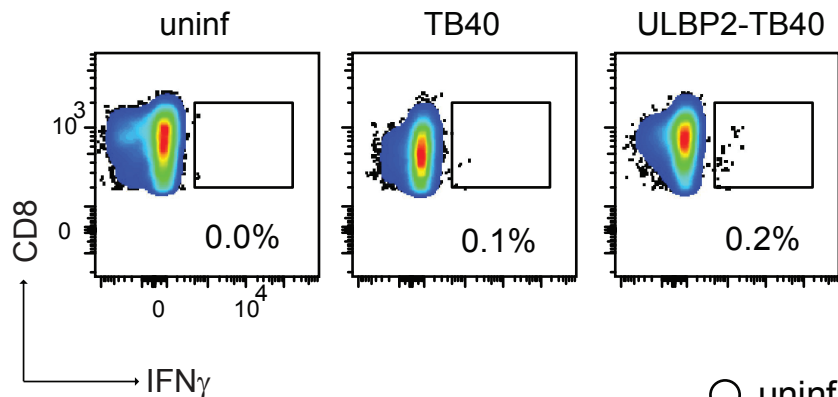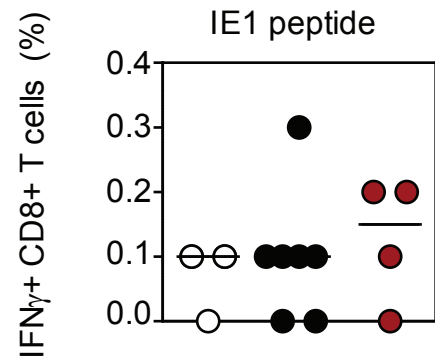

○ uninf ● TB40 ● ULBP2-TB40

**C**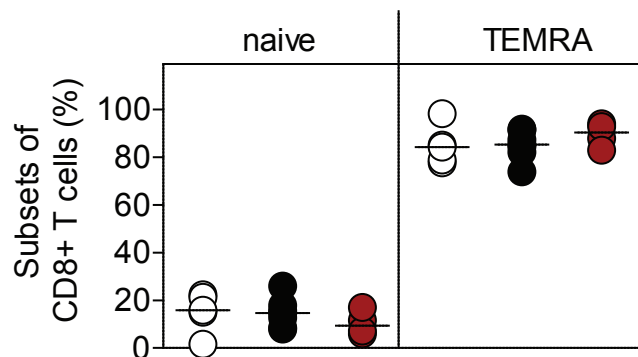

Supplement: ppat.1006015.s005.pdf [file ppat.1006015.s005.pdf]
