# Supplementary material for: Activation of Innate and Adaptive Immunity by a Recombinant Human Cytomegalovirus Strain Expressing an NKG2D Ligand
Source: PubMed Central journal article supplement (PMC5131914; doi:10.1371/journal.ppat.1006015), 2016-12-01
Supplement: ppat.1006015.s007.pdf [file ppat.1006015.s007.pdf]

**A**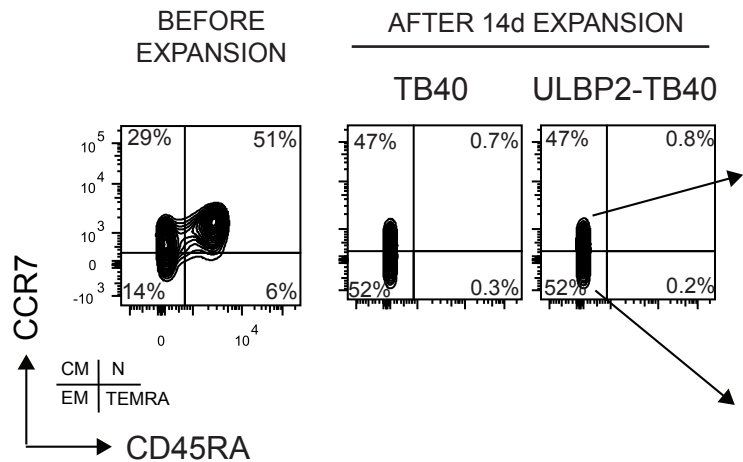**CENTRAL MEMORY**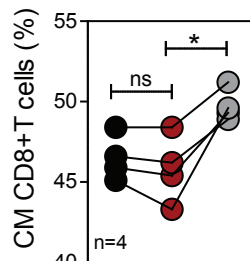**EFFECTOR MEMORY**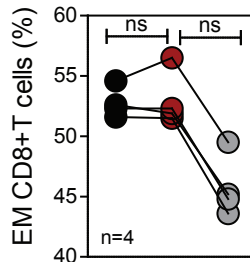**B**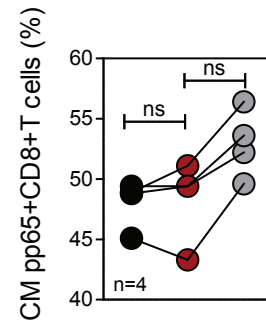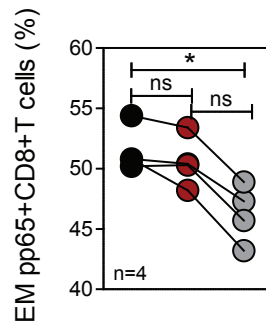**C**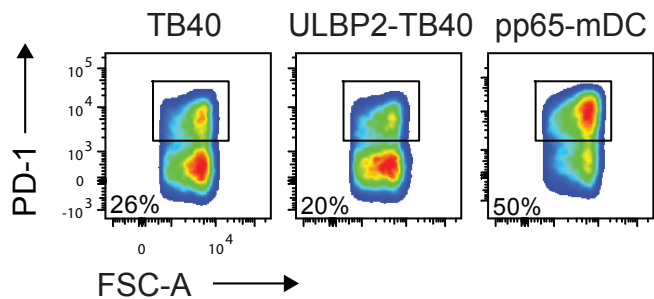**D**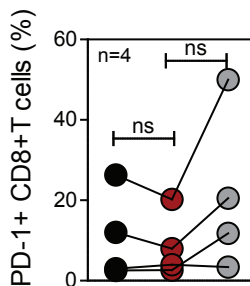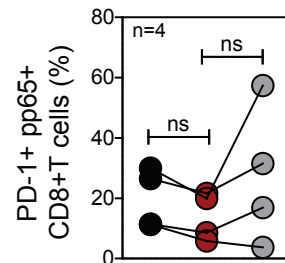

● TB40 ● ULBP2-TB40 ● pp65-mDC
